# Supplementary material for: Disrupted resting-state attentional networks in T2DM patients
Source: PubMed Central journal article supplement (PMC4459168; doi:10.1038/srep11148), 2015-06-08
Supplement: srep11148-s1.pdf [file srep11148-s1.pdf]

## **Title page**

### **Disrupted resting-state attentional networks in T2DM patients**

#### **Authors:**

Wenqing Xia<sup>1,2,#</sup>, Shaohua Wang<sup>3,#,\*</sup>, Hengyi Rao<sup>2</sup>, Andrea M Spaeth<sup>4</sup>, Pin Wang<sup>1</sup>, Yue Yang<sup>1</sup>,  
Rong Huang<sup>1</sup>, Rongrong Cai<sup>1</sup>, Haixia Sun<sup>1</sup>

<sup>#</sup> These authors contributed equally to the preparation of this manuscript.

#### **Author Affiliations:**

<sup>1</sup> Medical school of Southeast University, No.87 Dingjiaqiao Road, Nanjing, China, 210009;

<sup>2</sup> Center for functional Neuroimaging, University of Pennsylvania, 3710 Hamilton Walk,  
Philadelphia, PA, USA, 19104;

<sup>3</sup> Department of Endocrinology, affiliated ZhongDa Hospital of Southeast University, No.87  
Dingjiaqiao Road, Nanjing, China, 210009;

<sup>4</sup> Center for Sleep and Circadian Neurobiology, Perelman School of Medicine, University of  
Pennsylvania, 3710 Hamilton Walk, Philadelphia, PA, 19104

#### **\*Corresponding Author:**

Shaohua Wang, Ph.D, Prof.

Department of Endocrinology, affiliated Zhongda Hospital of Southeast University

No.87 Dingjiaqiao Road, Nanjing, China, 210009

E-mail: gyjwsh@126.com; Tel: 0086-25-83272261.

**Supplementary Table 1. Therapeutic agents of the T2DM patients.**

---

| Therapeutic agents     | Frequency (n) |
|------------------------|---------------|
| Insulin                | 15            |
| Biguanides             | 16            |
| Glucosidase Inhibitors | 6             |
| Sulfonylureas          | 10            |
| Non-Sulfonylurea       | 4             |
| Thiazolidinediones     | 6             |
| Only Diet and Exercise | 1             |

---
